# Supplementary material
Source: PubMed Central journal article supplement (PMC4137994)
Supplement: mp500114e_si_001.pdf [file mp500114e_si_001.pdf]

Figure S1

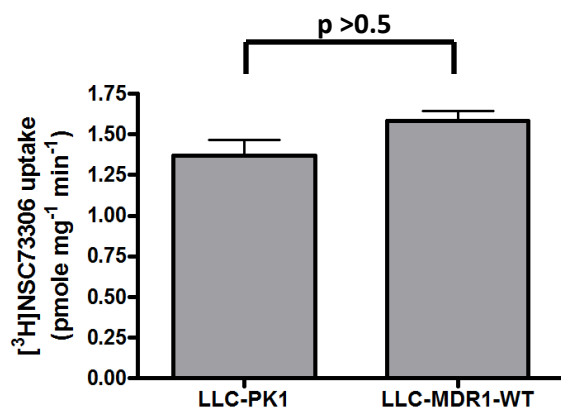

**Figure S1. Initial drug uptake rate of [<sup>3</sup>H]NSC73306 in LLC-PK1 cells and LLC-MDR1-WT cells.** LLC-PK1 and LLC-MDR1-WT cells were treated with [<sup>3</sup>H]NSC73306 in 37 °C for 5 min following cell lysis and scintillation counting. The initial uptake rate were calculated. Statistical significance were determined by Graphpad Prism.

Figure S2

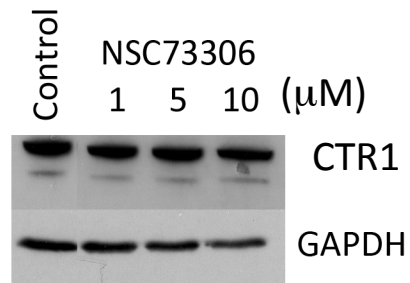

**Figure S2. CTR1 protein remains stable after 3 hr incubation with NSC73306.** KB-3-1 cells were treated with different concentrations of NSC73306 in 37 °C for 24 hrs following cell lysis and immunoblotting. Cells treated with DMSO were a control. CTR1 was detected by the anti-CTR1 antibody. The same blot was re-probed with anti-GAPDH monoclonal antibody as a loading control.
